# Supplementary material
Source: PubMed Central journal article supplement (PMC5925730)
Supplement: JCM.01951-17_zjm999095917s1.pdf [file JCM.01951-17_zjm999095917s1.pdf]

## Supplemental Tables

**TABLE S1** Real time RT-PCR primers and probes. Numbering is based on a consensus alignment of the Allston/08, Allston/09, Bari/07, Geel/08 and CU-246 genomes

| Test | Name         | Sequence                   |
|------|--------------|----------------------------|
| A    | 3461-F       | AGAATGGACATCTCTGTGGATGAA   |
|      | 3553-R       | CCAGGAACGAAACTGGATTGA      |
|      | Probe-3486-F | TCTTGATGCTCAAACATCGTGCTGCC |
| B    | 3443-F       | GACTTCAAGATGGACAAGAGAATGG  |
|      | 3553-R       | see above                  |
|      | Probe-3486-F | see above                  |
| C    | 5750-F       | GATTGCGAGGTTTCAGATGCTAA    |
|      | 5823-R       | GCCATTGCTCAGTTCTCAAACA     |
|      | Probe-5773-F | CAGTGACGCTCCCAATGCTCACGA   |

**TABLE S2** Amplification and sequencing primers used for sequencing the CU-246 genome and the VP1 genes of CU-47, CU-103, LSU/96-6931 and strain 143

| Primary sequencing primers |                              |
|----------------------------|------------------------------|
| Name <sup>a,b</sup>        | Sequence                     |
| 38-F                       | CAMTCGAGCTCWACCGCTCACAAA     |
| 334-R                      | GGAGTTGTCGGGTACACAAGCAGA     |
| 661-F                      | CCACAAGATTGCCTCTGGAATTGT     |
| 775-R                      | CGAGTTGGTTCCGAGGGCTTTCT      |
| 1404-F                     | CCAACCTGAACATTCTGAAAGCTGAAT  |
| 1582-R                     | CTGTATTGCGGTAATTCCAGCGA      |
| 1976-F                     | AACATTGACCACCACGATGCCTACA    |
| 2106-R                     | CAATTTAGGAGCATGGGGTTGGTATT   |
| 2351-F                     | GCGTTCTCCAAAACCAGGGTCATT     |
| 2830-F                     | CATTCGTGGCAAACACATCCAA       |
| 2853-R                     | TCTTGGATGTGTTTGCCACGAAT      |
| 3514-R                     | CAAGGCAGCACGATGTTTGAGCAT     |
| 3560-F                     | GCCAGGCAAATGAGACAGGACACT     |
| 3803-F                     | CACATTGGCCATGGTGTGTGCAT      |
| 4065-F                     | CGACGAAAACCCAACCTGGAGATT     |
| 4204-R                     | GTTTCATCTTGACTTTCACAACAGGAAT |
| 4404-R                     | GGATTTTCGTGGATCTTCAGCTCCAA   |
| 4696-F                     | CGAACAAGGCCTTGCAATACCACAT    |
| 4970-F <sup>c</sup>        | GATTACTCCAAGTGGGACTCCAC      |
| 5072-R                     | CAGCAGAATCAACGATAGGTGACTTGT  |
| 5135-F <sup>d</sup>        | GGTTTGCCATCTGGCATGCCGCTA     |
| 5219-R                     | TTGATTGGATGAGTGCACACCCAA     |
| 5300-R <sup>c</sup>        | TGACAATGTAATCATCACCATA       |
| 5532-F                     | CAATGAATTGGACTGAACCACCAA     |
| 5750-F                     | GATTGCGAGGTTTCAGATGCTAA      |
| 5824-R <sup>d</sup>        | AGCCATVGCTCARTTCTCAAACAC     |
| 6270-R                     | GCTGTTTCGGTCTGCGACCTGAA      |
| 6359-F                     | GGCACTCAACCTTCTGCTCCAGCTAT   |
| 6754-F                     | GTTGTGGCATGACATGCACGACA      |
| 6869-F                     | GAAACACGCGGCGGTACTGATT       |
| 6922-R                     | TCTTGCTGGGGGCTTGAGAAGAT      |
| 7432-F                     | CTTCACCCAACAAGGGAACATAATTGTT |
| 7529-R                     | TCTTAACCTTGTCTTCATCTTCACCAA  |
| 7804-F                     | TCAATTTCTCTTGAAGCCAGCTA      |
| 7858-F                     | GCAACATAATATTGCTGGCACATCAGT  |
| 7971-R                     | GGCATTGCAATTGACCCAATCAA      |
| 8018-R                     | GCACCAAGAGCTGTTCCCTGGAGTT    |
| 8254-F                     | GCTGCCGAGCGAAGGTT            |
| 8460-R                     | TTCCAATTGTTTTGCCAAATAGTTCAA  |

Specific primers for VP1 hypervariable regions of different strains

---

|        |                              |
|--------|------------------------------|
| 6080-F | ATCGTTCTRAAGCACCAATTGGAGTC   |
| 6105-F | GTTACACTGAATGGGAAGATGGCACTT  |
| 6685-R | AAACTGTAAGAGGCTTGTGCCTCCT    |
| 6726-R | ATAACTGGTTCTGTTTGCCTGGCAT    |
| 7110-R | AATTTAACTCCACGGTGYTCAGGAGTTG |
| 7228-R | GTAGTAGTCAGGCCACCCGTC        |
| 7252-R | GTTGTTTGCCACGATTATGTTGTCGTA  |
| 7366-F | AACCGCTCAAAACTCGACGGTGAA     |
| 7547-F | CAAGCCCAAACGACTGGTGGTAACTA   |
| 7688-F | CCTGAAGCCTTGGCAGTCTT         |
| 7938-R | GGCGCTTGTTGCGCTAGCT          |

---

<sup>a</sup> Name reflects numbering based on Allston/09.

<sup>b</sup> Primers designed for this study unless otherwise indicated.

<sup>c</sup> Previously described: Jiang X, Huang PW, Zhong WM, Farkas T, Cubitt DW, Matson DO. 1999. Design and evaluation of a primer pair that detects both Norwalk- and Sapporo-like caliciviruses by RT-PCR. *J. Virol. Methods* 83:145-154. [http://dx.doi.org/10.1016/S0166-0934\(99\)00114-7](http://dx.doi.org/10.1016/S0166-0934(99)00114-7).

<sup>d</sup> Previously described: Martella V, Pinto P, Lorusso E, Di Martino B, Wang Q, Larocca V, Cavalli A, Comero M, Decaro N, Banyai K, Saif L, Buonavoglia C. 2015. Detection and full-length genome characterization of novel canine vesiviruses. *Emerg. Infect. Dis.* 21:1433-1436. <http://dx.doi.org/10.3201/eid2108.140900>.

**TABLE S3** Conserved ORF1 regions used in combination for the design of Z probes (ACD)

---

3290-3633<sup>a</sup> (344 bp)

ATTGTGCTTACTGCCCTCCTGCTGTACATGAAAAGGTACAAGCCAAGGAGTGAAG  
CCAAGGGCAAGACAAAGGGAGGACGTGGAGCCATCCGCCATGGAGGGAAGGGGG  
TGGTCCTCGCCGATGATGAGTACGATGAATGGAGAGACTTCAAGATGGACAAGAG  
AATGGACATCTCTGTGGATGAATTCTTGATGCTCAAACATCGTGCTGCCTTGGGTT  
CCGATGACCGGGACTCAATCCAGTTTCGTTCCCTGGTGGTCCGCCAGGCAAATGAG  
ACAGGACACTGGCCTTGATCATGAAGACGTACCCGTAATTGGCAAAGGAAAGGTG  
AGTCACGAAGTGCA

3881-4260 (380 bp)

TTCAATGGTGAATTGGCATATTTCCAAATTAACACGTACCCAAATTCAGCTGCCCC  
AGTTGGGTATGACTCAAAGCCCGTGCGTGATCCGTGGGGCCGCCAGTTTCGACT  
GAGTGGAAACACGAGGTCTACAACACTTCCGCAGGGAAGATGTGTGGATCAATCG  
CATGGACTGCGACGAAGACTCAACCTGGAGATTGCGGTTTGCCCTACGTTGACGA  
TAGGGGGAGAATCGTCGGGCTTCACGCTGGGTCTGGTGGTGATGCGTCCCCAGGA  
CGAAAATCATCATTCCCTGTTGTGAAAGTCAAGATGAACTCCAACGGGGTCTTTGC  
TAAAGCATTTTGGCAAGAAGATCGCCGAACCATCAAATACAAAGGGCT

5740-6026 (287 bp)

CGATTGCGAGGTTTCAGATGCTAAGCAGTGACGCTCCCAATGCTCACGAAATAGTG  
TTTGAGAACTGAGCAATGGCTCGCTCAAGCGAATACAGTTCACAAAACCTCTCTGG  
ATGAGGTGTACGACTACGACACCTACGATCCTTTTCCAAATTTTGAAAGAAATCTG  
GCTAGCTATTACTCCACAGACTTCTGTCTCAAATCAATCTTGAAGACTTCTTTCTT  
GACCCTGAAGACTTTGATTTCTGTGACCACCCATTTGAATGCTGCTTTCCAGATTA  
CTTGGATT

---

<sup>a</sup>Nucleotide numbering is based on the consensus of an alignment of the 2117-like strains.
